# Supplementary material for: Silencing of the Transforming Growth Factor-β (TGFβ) Receptor II by Krüppel-like Factor 14 Underscores the Importance of a Negative Feedback Mechanism in TGFβ Signaling
Source: PubMed Central journal article supplement — J Biol Chem. 2009 Mar 6;284(10):6291–300. doi: 10.1074/jbc.M807791200 (PMC2649086; doi:10.1074/jbc.m807791200), 2009-03-06
Supplement: M807791200_1.pdf [file M807791200_1.pdf]

**Supplementary Table 1:**

| <u>Gene</u> | <u>Primer Pair</u>                                                                                     |
|-------------|--------------------------------------------------------------------------------------------------------|
| Sp1:        | Forward: 5'-CAC CTG TCA AAA CAT ATC AAG ACC CA-3'<br>Reverse: 5'-GAA GCC ATT GCC ACT GAT ATT AAT GG-3' |
| Sp2:        | Forward: 5'-TAA AGA CAC CCA CCG ACT CCT GAT-3'<br>Reverse: 5'-GTG CAG GTG CTG TTA TCT GAA TCC-3'       |
| Sp3:        | Forward: 5'-AAA ACC ATG TCT CCC AGG GCC TTA-3'<br>Reverse: 5'-TAA GTG CAG ACT GAC TAC CTA GAC-3'       |
| Sp4:        | Forward: 5'-TAT TCC AGG GTT TGG GGT CAA CAC-3'<br>Reverse: 5'-CCA ATT AAG GTC CAG CCT GCA AAC-3'       |
| Sp5:        | Forward: 5'-CCA AAA TGG AGC CAG GCT TCC AAC-3'<br>Reverse: 5'-ACC CGA GCA CTG TTT CAA ATC TCC-3'       |
| Sp6:        | Forward: 5'-TAA GGG GAA CTC CCA AAT GGG TGT-3'<br>Reverse: 5'-CTA CCC CCT CAA AGT GAG TTC ACA-3'       |
| Sp7:        | Forward: 5'-CAG AAG CTG TGA AAC CTC AAG TCC-3'<br>Reverse: 5'-TTC TTT CTC AGG GCT TCT AGG CAC-3'       |
| Sp8:        | Forward: 5'-AAA CGC ACT TTC GGG GCC TAG TTT-3'<br>Reverse: 5'-ATG CCT GAA CTG CCA GCA AAT GCA-3'       |
| KLF1:       | Forward: 5'-AGA GGA TCC AGG TGT GAT AG-3'<br>Reverse: 5'-CAG TCA CTA GGA GAG TCC AA-3'                 |
| KLF2:       | Forward: 5'-CCA AAC TGT GAC TGG TAT TT-3'<br>Reverse: 5'-CCC ACC TGT CTC TCT ATG TA-3'                 |
| KLF3:       | Forward: 5'-AGA ACA CAC ACA GGA GAA AA-3'<br>Reverse: 5'-CTG ACC ATA TGG AAG TTT TG-3'                 |
| KLF4:       | Forward: 5'-GTT TTG AGG AAG TGC TGA G-3'<br>Reverse: 5'-CAG TCA CAG TGG TAA GGT TT-3'                  |
| KLF5:       | Forward: 5'-AGA CCA GTT CTT CAC TGA CA-3'<br>Reverse: 5'-ATT AAG AGT GTC CAT TGC TG-3'                 |
| KLF6:       | Forward: 5'-ACC CGG CCC GAC ATG GAC GTG-3'<br>Reverse: 5'-CAG GCT GTT GTT CTC TAA GTT-3'               |
| KLF7:       | Forward: 5'-CCTCCACATGAAGAGACATA-3'<br>Reverse: 5'-CGG GAA ATA ATT CCA ATA GT-3'                       |
| KLF8:       | Forward: 5'-CTT TTG GCT AGT GAT TTC AG-3'<br>Reverse: 5'-AAC AGT AGG AAT GTT TGC TG-3'                 |
| KLF9:       | Forward: 5'-GAA GTC ACT GCT CTT TGG TC-3'<br>Reverse: 5'-AAG CAT AAA GGG CCT AGA AT-3'                 |
| KLF10:      | Forward: 5'-CAG AAG TCA GTG TTG GTC TC-3'<br>Reverse: 5'-TGA CTC CTT ATC CTT GAT GA-3'                 |
| KLF11:      | Forward: 5'-CAG TGT TCA TCA CCT CTA GC-3'<br>Reverse: 5'-AAG CAG CAA ACT TTT TAT CA-3'                 |
| KLF12:      | Forward: 5'-CAG TAT CTT CAG CGT CAT CT-3'<br>Reverse: 5'-GTC ACA TTT AGC AGG TCA TC-3'                 |
| KLF13:      | Forward: 5'-ATC CTA GCG GAC CTC AAC-3'<br>Reverse: 5'-CCT GTG TGA GTT CTC AGG TG-3'                    |
| KLF14:      | Forward: 5'-CTG TAG GAC AGT CAT TGC TGT CAG-3'<br>Reverse: 5'-TCC AGT TTC ACA TCC CTG GTT CCA-3'       |
| KLF15:      | Forward: 5'-GTT GGG TAT CTG GGT GAT AG-3'<br>Reverse: 5'-TCT CCT CCA GAA ACT CTT CA-3'                 |
| KLF16:      | Forward: 5'-AAC GCC CTT TTG CTT GTG ACT GGC-3'<br>Reverse: 5'-TAC ACC CCT GGA TGG CAG AAG CAT-3'       |
| GAPDH:      | Forward: 5'-TCT CCT CTG ACT TCA ACA GCG ACA-3'<br>Reverse: 5'-CTC TCT CTT CCT CTT GTG CTC TTG-3'       |
| B2M:        | Forward: 5'-AGC TGT GCT CGC GCT ACT CTC TC-3'<br>Reverse: 5'-GTG TCG GAT TGA TGA AAC CCA GAC AC-3'     |
| TUBB2:      | Forward: 5'-ACC ACA GTC CAT GCC ATC AC-3'<br>Reverse: 5'-TCC ACC ACC CTG TTG CTT GTA-3'                |

HPRT1: Forward: 5'-GAC CAG TCA ACA GGG GAC AT-3'  
Reverse: 5'-CCT GAC CAA GGA AAG CAA AG-3'

TGFβRII: Forward: 5'-TGG AGA ATG CTG AGT CCT TCA AGC-3'  
Reverse: 5'-TAG GGA GCC GTC TTC AGG AAT CTT-3'

p21: Forward: 5'-AAG ACC ATG TGG ACC TGT CAC TGT-3'  
Reverse: 5'-TAG GGC TTC CTC TTG GAG AAG ATC-3'
